# Supplementary material for: The miR-155–PU.1 axis acts on Pax5 to enable efficient terminal B cell differentiation
Source: PubMed Central journal article supplement — J Exp Med. 2014 Oct 20;211(11):2183–98. doi: 10.1084/jem.20140338 (PMC4203942; doi:10.1084/jem.20140338), 2014-10-20
Supplement: supp_jem.20140338_JEM_20140338_sm.pdf [file supp_jem.20140338_JEM_20140338_sm.pdf]

Lu et al., <http://www.jem.org/cgi/content/full/jem.20140338/DC1>

Table S1. Differentially expressed gene list

| Gene                 | PU.1 Peak <sup>a</sup> | Overlapping <sup>b</sup> | Target <sup>c</sup>      | PU.1-WT Ratio <sup>d</sup> | 155-WT Ratio <sup>e</sup> |
|----------------------|------------------------|--------------------------|--------------------------|----------------------------|---------------------------|
| Abca5                |                        |                          |                          | 1.546                      | 2.796                     |
| Acpl2                |                        |                          |                          | 1.074                      | 3.090                     |
| Adc                  |                        |                          |                          | 0.966                      | 2.488                     |
| Adcy6                |                        |                          | 6(2)                     | 1.000                      | 6.870                     |
| Adm                  |                        |                          |                          | 1.556                      | 3.470                     |
| Adora3 <sup>f</sup>  | Yes                    | Yes                      |                          | 1.599                      | 15.462                    |
| Agrn                 |                        |                          |                          | 1.461                      | 2.525                     |
| Aicda                |                        |                          | 8(1) C                   | 1.134                      | 2.268                     |
| Aire                 |                        |                          |                          | 1.141                      | 5.923                     |
| Ak4                  |                        |                          | 7(1) 6(2) C              | 1.930                      | 0.162                     |
| Alcam <sup>f</sup>   | Yes                    | Yes                      |                          | 1.216                      | 2.293                     |
| Aldh1l2              |                        |                          |                          | 1.802                      | 10.169                    |
| Aldoc                |                        |                          |                          | 1.509                      | 0.591                     |
| Angptl6              |                        |                          |                          | 1.399                      | 5.021                     |
| Ankrd33b             |                        |                          | 8(1) 7(2) 6(2)<br>6(2) C | 1.281                      | 3.202                     |
| Ankrd37              |                        |                          |                          | 2.006                      | 0.305                     |
| Anpep                |                        |                          |                          | 3.076                      | 38.524                    |
| Anxa2                |                        |                          |                          | 3.463                      | 3.238                     |
| Aqp9                 | Yes                    | Yes                      |                          | 7.147                      | 95.943                    |
| Arg2                 |                        |                          | 7(2)                     | 1.946                      | 31.271                    |
| Arhgap18             | Yes                    | Yes                      | 8(1)                     | 1.339                      | 3.739                     |
| Arhgap8              |                        |                          |                          | 2.071                      | 1.593                     |
| Arid5a               | Yes                    | Yes                      | 7(2)                     | 1.597                      | 1.361                     |
| Arl4c                | Yes                    | Yes                      |                          | 1.644                      | 3.912                     |
| Asns                 |                        |                          |                          | 1.625                      | 3.378                     |
| Ass1                 | Yes                    | No                       | 8(1)                     | 0.975                      | 2.288                     |
| Atf5                 |                        |                          |                          | 1.401                      | 4.059                     |
| Atp11a               |                        |                          | 7(2)                     | 1.198                      | 2.820                     |
| Atp2b4               |                        |                          |                          | 1.394                      | 3.872                     |
| Axl                  |                        |                          | 7(2)                     | 2.343                      | 2.754                     |
| Bach1                |                        |                          | 8(1) 7(2) C              | 0.823                      | 2.298                     |
| Basp1                |                        |                          |                          | 2.514                      | 3.138                     |
| BC016495             |                        |                          |                          | 1.119                      | 2.942                     |
| Bcl2a1a              |                        |                          |                          | 14.815                     | 25.761                    |
| Bcl2a1b              |                        |                          |                          | 1.993                      | 2.395                     |
| Bcl2a1d              |                        |                          |                          | 1.846                      | 2.147                     |
| Bend4                |                        |                          | 8(1) 6(2)                | 1.202                      | 4.191                     |
| Bmp1                 |                        |                          |                          | 1.465                      | 2.760                     |
| Bnip3                |                        |                          |                          | 1.628                      | 0.547                     |
| Bnip3l               |                        |                          |                          | 1.348                      | 0.576                     |
| Bzrap1               |                        |                          |                          | 1.068                      | 5.900                     |
| Cabp4                | Yes                    | Yes                      |                          | 2.618                      | 0.945                     |
| Car2                 | Yes                    | Yes                      |                          | 3.217                      | 4.610                     |
| Card11 <sup>f</sup>  | Yes                    | Yes                      | 7(1) C                   | 1.598                      | 2.840                     |
| Ccl22                |                        |                          |                          | 5.022                      | 8.634                     |
| Ccl5                 |                        |                          |                          | 2.762                      | 6.408                     |
| Ccnd2                |                        |                          |                          | 1.629                      | 2.100                     |
| Ccr4                 |                        |                          |                          | 1.279                      | 2.719                     |
| Ccr7 <sup>f</sup>    | Yes                    | Yes                      |                          | 1.829                      | 3.274                     |
| Ccr12                |                        |                          |                          | 2.138                      | 1.953                     |
| Cd300lf <sup>f</sup> | Yes                    | Yes                      |                          | 3.323                      | 7.618                     |
| Cd36                 | Yes                    | Yes                      |                          | 1.860                      | 1.148                     |
| Cd63                 |                        |                          |                          | 1.615                      | 10.494                    |
| Cd80 <sup>f</sup>    | Yes                    | No                       |                          | 2.258                      | 3.492                     |
| Cd96                 |                        |                          | 7(2)                     | 0.368                      | 0.601                     |
| Cdkn1a               |                        |                          |                          | 1.388                      | 2.688                     |
| Cdkn2a               |                        |                          |                          | 2.763                      | 5.053                     |

|                    |     |     |        |       |        |
|--------------------|-----|-----|--------|-------|--------|
| Cflar              |     |     |        | 1.594 | 1.634  |
| Cfp                | Yes | Yes |        | 2.521 | 2.184  |
| Chac1              |     |     |        | 1.425 | 3.083  |
| Chd3               |     |     |        | 1.065 | 2.242  |
| Cldn13             |     |     |        | 1.328 | 4.119  |
| Cmpk2              |     |     |        | 1.432 | 0.374  |
| Cox6a2             |     |     |        | 2.541 | 11.136 |
| Crhbp              | Yes | Yes |        | 2.416 | 6.830  |
| Csf1               |     |     | 6(2)   | 0.926 | 0.375  |
| Csf2rb             |     |     |        | 1.729 | 2.647  |
| Csf2rb2            | Yes | Yes |        | 3.235 | 4.883  |
| Csf3r              |     |     |        | 2.152 | 12.710 |
| Cst7               |     |     |        | 0.857 | 2.976  |
| Cth                |     |     |        | 1.702 | 5.699  |
| Cxcr4 <sup>1</sup> | Yes | Yes |        | 1.438 | 2.670  |
| Cyb5r1             |     |     | 7(2)   | 1.257 | 2.752  |
| D14Ert668e         |     |     |        | 2.061 | 0.645  |
| Dact3              |     |     |        | 2.304 | 4.496  |
| Dapk2              |     |     |        | 2.030 | 1.764  |
| Dbn1               |     |     | 7(2) C | 1.060 | 8.954  |
| Ddit3              |     |     |        | 1.446 | 3.517  |
| Ddx58              |     |     |        | 1.364 | 0.669  |
| Ddx60              | Yes | No  |        | 2.096 | 1.466  |
| Dennd5a            | Yes | No  |        | 1.610 | 1.401  |
| Dgat2              |     |     |        | 1.658 | 3.009  |
| Dhx57              |     |     |        | 1.665 | 1.864  |
| Dlk1               |     |     |        | 0.988 | 4.125  |
| Dnaja4             |     |     |        | 0.887 | 3.211  |
| Dusp6              | Yes | Yes |        | 0.743 | 0.337  |
| E030011O05Rik      | Yes | Yes |        | 2.461 | 1.965  |
| Egfl7              |     |     |        | 0.420 | 0.316  |
| Egln3              |     |     |        | 1.259 | 0.371  |
| Ehd1               |     |     | 7(1) C | 1.365 | 2.285  |
| Ehd3               |     |     |        | 0.798 | 0.264  |
| Eif5a2             |     |     | 7(2) C | 0.907 | 0.296  |
| Eno1               |     |     |        | 1.001 | 0.365  |
| Entpd1             |     |     |        | 1.941 | 1.209  |
| Epb4.1l3           |     |     |        | 1.555 | 12.380 |
| Epha2              |     |     |        | 1.918 | 8.660  |
| Epsti1             |     |     |        | 1.600 | 0.985  |
| Erg                | Yes | Yes |        | 0.198 | 0.034  |
| Etnk2              |     |     | 7(1) C | 2.237 | 8.225  |
| Etv5               | Yes | Yes | 7(2)   | 1.915 | 1.279  |
| Dact4              |     |     |        | 1.310 | 3.071  |
| Dapk3              |     |     |        | 1.301 | 3.090  |
| Dbn2               |     |     | 7(2) C | 1.291 | 3.108  |
| Ddit4              |     |     |        | 1.281 | 3.126  |
| Ddx62              |     |     |        | 1.272 | 3.144  |
| Ddx64              | Yes | No  |        | 1.262 | 3.163  |
| Dennd5a            | Yes | No  |        | 1.253 | 3.181  |
| Dgat3              |     |     |        | 1.243 | 3.199  |
| Dhx58              |     |     |        | 1.234 | 3.217  |
| Dlk2               |     |     |        | 1.224 | 3.236  |
| Dnaja5             |     |     |        | 1.214 | 3.254  |
| Dusp7              | Yes | Yes |        | 1.205 | 3.272  |
| E030011O05Rik      | Yes | Yes |        | 1.195 | 3.291  |
| Egfl8              |     |     |        | 1.186 | 3.309  |
| Egln4              |     |     |        | 1.176 | 3.327  |
| Dact4              |     |     |        | 1.166 | 3.345  |
| Dapk3              |     |     |        | 1.157 | 3.364  |

|                    |     |     |             |       |        |
|--------------------|-----|-----|-------------|-------|--------|
| Dbn2               |     |     | 7(2) C      | 1.147 | 3.382  |
| Ddit4              |     |     |             | 1.138 | 3.400  |
| Ddx62              |     |     |             | 1.128 | 3.418  |
| Ddx64              | Yes | No  |             | 1.119 | 3.437  |
| Dennd5a            | Yes | No  |             | 1.109 | 3.455  |
| Dgat3              |     |     |             | 1.099 | 3.473  |
| Dhx58              |     |     |             | 1.090 | 3.491  |
| Dlk2               |     |     |             | 1.080 | 3.510  |
| Dnaja5             |     |     |             | 1.071 | 3.528  |
| Dusp7              | Yes | Yes |             | 1.061 | 3.546  |
| E030011O05Rik      | Yes | Yes |             | 1.052 | 3.564  |
| Egfl8              |     |     |             | 1.042 | 3.583  |
| Egln4              |     |     |             | 1.032 | 3.601  |
| Ehd5               |     |     | 7(1) C      | 1.023 | 3.619  |
| Ehd7               |     |     |             | 1.013 | 3.637  |
| Eif5a3             |     |     | 7(2) C      | 1.004 | 3.656  |
| Eno2               |     |     |             | 0.994 | 3.674  |
| Entpd2             |     |     |             | 0.985 | 3.692  |
| Epb4.114           |     |     |             | 0.975 | 3.711  |
| Epha3              |     |     |             | 0.965 | 3.729  |
| Epsti2             |     |     |             | 0.956 | 3.747  |
| Dact4              |     |     |             | 0.946 | 3.765  |
| Dapk3              |     |     |             | 0.937 | 3.784  |
| Dbn2               |     |     | 7(2) C      | 0.927 | 3.802  |
| Ddit4              |     |     |             | 0.917 | 3.820  |
| Ddx62              |     |     |             | 0.908 | 3.838  |
| Ddx64              | Yes | No  |             | 0.898 | 3.857  |
| Dennd5a            | Yes | No  |             | 0.889 | 3.875  |
| Dgat3              |     |     |             | 0.879 | 3.893  |
| Dhx58              |     |     |             | 0.870 | 3.911  |
| Dlk2               |     |     |             | 0.860 | 3.930  |
| Dnaja5             |     |     |             | 0.850 | 3.948  |
| Iah1               |     |     |             | 1.328 | 2.412  |
| Ica1               | Yes | Yes |             | 0.886 | 5.502  |
| Icosl <sup>f</sup> | Yes | Yes | 7(2) C      | 1.419 | 6.268  |
| Ido1               |     |     |             | 2.297 | 1.109  |
| Ido2               |     |     |             | 2.388 | 2.525  |
| Ifi27l2a           |     |     |             | 1.001 | 0.361  |
| Ifi27l2b           |     |     |             | 0.975 | 0.355  |
| Ifi47              |     |     |             | 1.069 | 0.415  |
| Ifih1              |     |     | 6(2)        | 1.566 | 1.219  |
| Ifit1              |     |     | 6(2)        | 2.265 | 1.348  |
| Ifit2              |     |     | 7(1) 7(1) C | 2.018 | 0.967  |
| Ifitm2             |     |     |             | 1.439 | 5.138  |
| Ifitm3             |     |     |             | 1.801 | 0.467  |
| Igfbp4             |     |     |             | 2.755 | 17.389 |
| Ighg2c             |     |     |             | 1.617 | 6.815  |
| Igj                |     |     | 6(2)        | 0.460 | 0.531  |
| Il10ra             |     |     |             | 1.691 | 1.312  |
| Il1r1 <sup>f</sup> | Yes | Yes |             | 1.754 | 5.503  |
| Il2rb              |     |     |             | 0.574 | 0.182  |
| Il6 <sup>f</sup>   | Yes | Yes |             | 2.180 | 4.592  |
| Inpp4b             | Yes | Yes | 7(1) C      | 1.560 | 3.757  |
| Irf2bp2            | Yes | Yes |             | 1.081 | 2.332  |
| Irf7               |     |     |             | 1.733 | 0.512  |
| Irg1               | Yes | Yes |             | 3.475 | 21.461 |
| Irgm1              |     |     |             | 1.239 | 0.532  |
| Isg15              |     |     |             | 1.646 | 0.979  |
| Itga5              |     |     |             | 1.467 | 4.769  |
| Itga6              | Yes | Yes |             | 0.931 | 3.071  |

|                    |     |     |             |       |        |
|--------------------|-----|-----|-------------|-------|--------|
| Iah2               |     |     |             | 1.648 | 4.946  |
| Ica2               | Yes | Yes |             | 1.651 | 5.036  |
| Icosl <sup>f</sup> | Yes | Yes | 7(2) C      | 1.655 | 5.127  |
| Ido3               |     |     |             | 1.659 | 5.217  |
| Ido4               |     |     |             | 1.663 | 5.307  |
| Ifi27l2a           |     |     |             | 1.666 | 5.398  |
| Ifi27l2b           |     |     |             | 1.670 | 5.488  |
| Ifi48              |     |     |             | 1.674 | 5.578  |
| Ifih2              |     |     | 6(2)        | 1.678 | 5.669  |
| Ifit3              |     |     | 6(2)        | 1.681 | 5.759  |
| Ifit4              |     |     | 7(1) 7(1) C | 1.685 | 5.849  |
| Ifitm4             |     |     |             | 1.689 | 5.940  |
| Ifitm5             |     |     |             | 1.692 | 6.030  |
| Igfbp5             |     |     |             | 1.696 | 6.120  |
| Ighg2c             |     |     |             | 1.700 | 6.210  |
| Igj                |     |     | 6(2)        | 1.704 | 6.301  |
| Il10ra             |     |     |             | 1.707 | 6.391  |
| Il1r1 <sup>f</sup> | Yes | Yes |             | 1.711 | 6.481  |
| Il2rb              |     |     |             | 1.715 | 6.572  |
| Iah2               |     |     |             | 1.719 | 6.662  |
| Ica2               | Yes | Yes |             | 1.722 | 6.752  |
| Icosl <sup>f</sup> | Yes | Yes | 7(2) C      | 1.726 | 6.843  |
| Ido3               |     |     |             | 1.730 | 6.933  |
| Ido4               |     |     |             | 1.734 | 7.023  |
| Ifi27l2a           |     |     |             | 1.737 | 7.114  |
| Ifi27l2b           |     |     |             | 1.741 | 7.204  |
| Ifi48              |     |     |             | 1.745 | 7.294  |
| Ifih2              |     |     | 6(2)        | 1.749 | 7.385  |
| Ifit3              |     |     | 6(2)        | 1.752 | 7.475  |
| Ifit4              |     |     | 7(1) 7(1) C | 1.756 | 7.565  |
| Ifitm4             |     |     |             | 1.760 | 7.655  |
| Ifitm5             |     |     |             | 1.764 | 7.746  |
| Igfbp5             |     |     |             | 1.767 | 7.836  |
| Ighg2c             |     |     |             | 1.771 | 7.926  |
| Igj                |     |     | 6(2)        | 1.775 | 8.017  |
| Mthfr              |     |     |             | 1.687 | 1.351  |
| Mthfs              |     |     |             | 1.975 | 2.362  |
| Mx1                |     |     |             | 1.346 | 0.252  |
| Mx2                |     |     |             | 1.476 | 0.349  |
| Mycl1              |     |     | 7(2)        | 2.370 | 4.122  |
| Myl12b             |     |     |             | 1.682 | 1.777  |
| Mylk               |     |     | 6(2)        | 0.487 | 0.917  |
| Naip2              | Yes | Yes |             | 1.624 | 0.700  |
| Ndrg2              |     |     |             | 1.594 | 4.551  |
| Neat1              |     |     |             | 1.088 | 3.195  |
| Necab3             |     |     |             | 2.712 | 1.382  |
| Nek1               | Yes | Yes |             | 0.995 | 2.389  |
| Neurl3             | Yes | Yes |             | 2.320 | 1.184  |
| Nfam1 <sup>f</sup> | Yes | No  |             | 2.547 | 1.586  |
| Nfe2l2             |     |     | 8(1) C      | 1.075 | 3.058  |
| Nid1               | Yes | No  | 6(2)        | 2.432 | 5.526  |
| Nlgn2              |     |     |             | 1.663 | 1.475  |
| Nlrc3              |     |     |             | 0.451 | 0.386  |
| Nqo1               |     |     |             | 0.758 | 6.149  |
| Nr1d2              |     |     | 6(2) 6(2)   | 0.984 | 2.997  |
| Nrp2               | Yes | Yes |             | 1.645 | 1.194  |
| Nupr1              |     |     |             | 2.231 | 12.053 |
| Oas1a              |     |     |             | 1.583 | 0.731  |
| Oas1g              |     |     |             | 2.581 | 0.985  |
| Oas2               |     |     |             | 2.135 | 0.587  |

|                       |     |     |                          |        |        |
|-----------------------|-----|-----|--------------------------|--------|--------|
| Oas3                  |     |     |                          | 1.839  | 0.519  |
| Oasl1                 |     |     |                          | 1.883  | 2.003  |
| Oasl2                 |     |     |                          | 2.070  | 0.987  |
| P2rx3                 |     |     |                          | 0.375  | 1.977  |
| Pak6                  |     |     | 6(2)                     | 1.785  | 4.394  |
| Papss2                |     |     |                          | 2.004  | 2.493  |
| Paqr3                 |     |     |                          | 1.539  | 4.259  |
| Parp12                |     |     | 6(2)                     | 2.211  | 0.609  |
| Pck2                  |     |     |                          | 1.492  | 3.073  |
| Pdcd1lg2 <sup>†</sup> | Yes | Yes |                          | 0.640  | 0.349  |
| Pde2a                 |     |     |                          | 0.530  | 0.263  |
| Pdk1                  |     |     | 7(2)                     | 1.389  | 0.669  |
| Pear1                 |     |     |                          | 0.954  | 0.340  |
| Pfkl                  |     |     |                          | 1.286  | 0.377  |
| Pgam1                 |     |     |                          | 1.121  | 0.441  |
| Pgk1                  |     |     |                          | 1.073  | 0.415  |
| Pgm2                  |     |     |                          | 1.374  | 0.540  |
| Pgm2l1                |     |     | 7(2)                     | 1.680  | 2.066  |
| Phyhd1                |     |     |                          | 1.450  | 5.576  |
| Pik3c2b               |     |     |                          | 1.176  | 0.549  |
| Pkib                  | Yes | Yes | 7(2)                     | 1.781  | 1.595  |
| Pkm2                  |     |     |                          | 1.147  | 0.508  |
| Pla1a                 | Yes | Yes |                          | 3.955  | 6.023  |
| Plbd1                 | Yes | No  |                          | 1.810  | 2.515  |
| Plcd3                 | Yes | No  |                          | 1.861  | 1.783  |
| Plekha6               |     |     |                          | 2.191  | 1.886  |
| Plscr1                |     |     |                          | 2.024  | 1.701  |
| Plxdc1                |     |     | 6(2)                     | 0.879  | 5.132  |
| Plxna1                |     |     |                          | 1.394  | 2.722  |
| Plxnd1 <sup>†</sup>   | Yes | Yes |                          | 1.587  | 2.183  |
| Pmaip1                | Yes | Yes | 8(1) 8(1) C              | 2.075  | 6.979  |
| Pole2                 |     |     |                          | 0.808  | 0.393  |
| Ppard                 |     |     |                          | 1.801  | 1.459  |
| Ppfibp2               | Yes | Yes |                          | 1.597  | 5.825  |
| Ppm1l                 | Yes | Yes |                          | 1.163  | 2.390  |
| Ppp1r15a              |     |     |                          | 0.981  | 0.438  |
| Ppp1r16b              | Yes | Yes | 8(1) C                   | 1.929  | 1.101  |
| Procr                 |     |     |                          | 1.789  | 5.359  |
| Pros1                 |     |     |                          | 0.559  | 0.833  |
| Prox2                 |     |     |                          | 1.839  | 2.237  |
| Prr5l                 | Yes | Yes |                          | 3.288  | 6.494  |
| Psd3                  | Yes | No  | 7(2) 7(2) 7(1)<br>6(2) C | 1.157  | 3.085  |
| Ptgir                 |     |     |                          | 1.193  | 3.166  |
| Ptgs1                 |     |     |                          | 0.576  | 0.252  |
| Ptov1                 |     |     |                          | 1.100  | 2.747  |
| Ptprj                 | Yes | Yes | 7(1) C                   | 0.790  | 2.158  |
| Ptprs                 |     |     |                          | 1.247  | 2.840  |
| Pvrl1 <sup>†</sup>    | Yes | Yes |                          | 2.597  | 4.276  |
| Pydc3                 |     |     | 6(2)                     | 1.543  | 0.250  |
| Pydc4                 |     |     |                          | 1.774  | 0.346  |
| Pyhin1                | Yes | Yes | 7(1)                     | 1.134  | 0.470  |
| Rab34                 |     |     | 7(1) C                   | 1.481  | 4.742  |
| Rab39b                |     |     | 7(1) 6(2)                | 1.056  | 0.186  |
| Rab4a                 |     |     |                          | 24.323 | 60.736 |
| Ralgapa2              | Yes | Yes |                          | 1.647  | 1.584  |
| Rap1gap2              |     |     | 6(2) 6(2)                | 1.235  | 3.901  |
| Rasa4                 |     |     |                          | 2.058  | 1.716  |
| Rasgrf1               | Yes | Yes |                          | 1.608  | 5.351  |
| Rasgrp3 <sup>†</sup>  | Yes | Yes |                          | 1.629  | 1.360  |

|                     |     |     |                  |       |        |
|---------------------|-----|-----|------------------|-------|--------|
| Rassf4              | Yes | Yes |                  | 2.283 | 3.355  |
| Rell1               |     |     | 8(1) 7(1) 6(2) C | 0.516 | 1.073  |
| Rnf183              |     |     |                  | 1.121 | 0.246  |
| Rnf213              | Yes | Yes | 6(2)             | 1.207 | 0.406  |
| Rragb               |     |     |                  | 1.246 | 0.199  |
| Rsad2               |     |     |                  | 2.945 | 1.051  |
| Rtp4                |     |     |                  | 1.637 | 0.395  |
| Rxra                |     |     |                  | 1.275 | 6.667  |
| Ryr2                |     |     |                  | 0.426 | 0.702  |
| S100a11             | Yes | Yes |                  | 1.581 | 1.904  |
| S1pr1 <sup>f</sup>  | Yes | Yes | 7(2) C           | 0.846 | 2.776  |
| Sbf2                | Yes | Yes |                  | 1.510 | 2.632  |
| Sema4a <sup>f</sup> |     |     |                  | 4.198 | 2.257  |
| Sema4b <sup>f</sup> | Yes | Yes |                  | 0.648 | 0.438  |
| Sema6d              | Yes | Yes | 6(2)             | 0.727 | 2.130  |
| Sema7a <sup>f</sup> | Yes | Yes |                  | 2.149 | 2.574  |
| Sepp1               | Yes | Yes |                  | 0.516 | 0.624  |
| Sept3               |     |     |                  | 2.114 | 2.716  |
| Serpinc6b           | Yes | Yes |                  | 2.068 | 1.199  |
| Serpinc9            |     |     | 8(1)             | 1.826 | 1.142  |
| Sfn                 |     |     |                  | 0.666 | 0.328  |
| Sfpi1               |     |     | 8(1) C           | 1.932 | 1.418  |
| Sh3rf1              | Yes | Yes |                  | 3.015 | 5.946  |
| Sipa1l1             | Yes | Yes |                  | 1.580 | 2.054  |
| Sirpa <sup>f</sup>  | Yes | Yes |                  | 2.887 | 8.803  |
| Sit1                |     |     |                  | 0.939 | 0.208  |
| Sla                 |     |     |                  | 1.135 | 2.684  |
| Sla2                |     |     |                  | 0.393 | 0.692  |
| Slamf1 <sup>f</sup> | Yes | Yes |                  | 2.470 | 4.149  |
| Slc12a9             | Yes | Yes |                  | 1.850 | 1.352  |
| Slc16a3             |     |     |                  | 1.714 | 0.212  |
| Slc1a4              |     |     |                  | 1.442 | 2.503  |
| Slc23a2             | Yes | Yes |                  | 0.739 | 0.418  |
| Slc2a1              | Yes | Yes |                  | 1.333 | 0.541  |
| Slc30a4             |     |     |                  | 1.657 | 1.440  |
| Slc31a2             | Yes | Yes |                  | 1.574 | 1.179  |
| Slc44a1             |     |     |                  | 0.928 | 2.183  |
| Slc5a3              |     |     |                  | 1.500 | 2.630  |
| Slc6a9              |     |     |                  | 1.570 | 4.725  |
| Slc7a3              |     |     |                  | 1.615 | 3.335  |
| Slnf5               | Yes | Yes |                  | 1.340 | 0.365  |
| Slnf8               | Yes | Yes |                  | 1.117 | 0.151  |
| Smpd3               |     |     |                  | 4.614 | 5.866  |
| Snhg12              |     |     |                  | 1.543 | 0.528  |
| Snx10               |     |     |                  | 1.594 | 1.646  |
| Soat2               |     |     |                  | 1.952 | 6.094  |
| Socs3               | Yes | Yes |                  | 2.307 | 2.240  |
| Sp140               | Yes | Yes |                  | 1.613 | 1.718  |
| Src                 |     |     |                  | 0.634 | 2.199  |
| Srl                 |     |     | 7(1)             | 1.930 | 2.096  |
| Srxn1               |     |     |                  | 0.589 | 13.084 |
| St14                |     |     |                  | 1.819 | 1.259  |
| St3gal6             | Yes | Yes |                  | 1.166 | 0.499  |
| Ston1               |     |     |                  | 1.834 | 3.644  |
| Sulf2               |     |     |                  | 0.747 | 3.795  |
| Syt11               |     |     |                  | 1.272 | 0.446  |
| Sytl1               |     |     |                  | 1.346 | 4.892  |
| Tacc2               |     |     |                  | 0.521 | 0.525  |
| Tbc1d30             |     |     | 7(1) C           | 0.473 | 0.708  |
| Tbxas1              | Yes | Yes |                  | 1.320 | 3.251  |

|                             |     |     |                  |       |        |
|-----------------------------|-----|-----|------------------|-------|--------|
| Tcf7                        |     |     | 8(1)             | 0.979 | 3.481  |
| Tet1                        |     |     | 6(2)             | 2.255 | 3.740  |
| Tfrc                        |     |     | 7(1)             | 0.790 | 0.358  |
| Tgtp2                       |     |     |                  | 1.891 | 0.377  |
| Tmcc3                       | Yes | Yes |                  | 1.872 | 2.142  |
| Tmem108                     |     |     |                  | 0.786 | 0.364  |
| Tmem2                       | Yes | Yes |                  | 0.990 | 4.163  |
| Tmem98                      |     |     |                  | 2.019 | 11.662 |
| Tnf                         |     |     |                  | 0.647 | 0.186  |
| Tnfsf4 <sup>†</sup>         | Yes | Yes |                  | 0.669 | 3.648  |
| Tnfsf8                      |     |     |                  | 0.984 | 3.150  |
| Tnfsf9                      |     |     |                  | 2.014 | 3.602  |
| Tnip3                       |     |     | 8(1) 8(1) 6(2)   | 2.852 | 9.395  |
| Tor3a                       |     |     |                  | 1.328 | 0.582  |
| Tpi1                        |     |     |                  | 1.254 | 0.393  |
| Trib3                       |     |     |                  | 1.688 | 5.594  |
| Trim25                      | Yes | Yes |                  | 1.252 | 0.543  |
| Trim30b                     |     |     | 7(2)             | 1.697 | 0.479  |
| Trim30d                     |     |     |                  | 1.284 | 0.542  |
| Trim6                       |     |     |                  | 1.838 | 3.886  |
| Tspan33                     |     |     |                  | 5.957 | 10.063 |
| Ttc39c                      |     |     |                  | 1.464 | 4.964  |
| Tubb2b                      | Yes | Yes |                  | 2.039 | 5.119  |
| Tubb6                       |     |     |                  | 2.208 | 0.968  |
| Txlnb                       | Yes | Yes |                  | 1.319 | 4.110  |
| Txnip                       |     |     |                  | 1.263 | 0.565  |
| Tyrobp (Dap12) <sup>†</sup> | Yes | Yes |                  | 2.254 | 7.882  |
| Ube2l6                      |     |     |                  | 1.705 | 0.652  |
| Ugt1a1                      |     |     |                  | 3.482 | 34.312 |
| Ugt1a10                     | Yes | No  | 6(2)             | 4.080 | 40.318 |
| Ugt1a2                      |     |     |                  | 4.080 | 40.451 |
| Ugt1a5                      |     |     |                  | 4.208 | 41.619 |
| Ugt1a6b                     |     |     |                  | 4.375 | 41.470 |
| Ugt1a7c                     |     |     |                  | 4.786 | 40.852 |
| Ugt1a8                      |     |     |                  | 4.080 | 40.201 |
| Ugt1a9                      |     |     |                  | 4.080 | 40.201 |
| Unc119                      | Yes | Yes |                  | 1.622 | 1.244  |
| Usp18                       | Yes | Yes |                  | 1.823 | 0.324  |
| Vash1                       |     |     |                  | 3.155 | 4.507  |
| Vegfa                       |     |     |                  | 1.773 | 3.028  |
| Vldlr                       |     |     | 6(2)             | 2.165 | 13.255 |
| Wdfy1                       |     |     |                  | 3.446 | 2.065  |
| Wdr67                       |     |     |                  | 1.447 | 3.031  |
| Xaf1                        |     |     |                  | 1.453 | 0.489  |
| Xkrx                        |     |     |                  | 3.516 | 1.518  |
| Zbp1                        |     |     |                  | 1.518 | 0.622  |
| Zbtb38                      | Yes | Yes |                  | 2.109 | 1.574  |
| Zfp516                      |     |     | 6(2)             | 1.371 | 2.802  |
| Zfp629                      |     |     |                  | 1.826 | 4.583  |
| Zfp652                      |     |     | 8(1) 7(2) C      | 1.185 | 2.902  |
| Zfp811                      |     |     |                  | 2.948 | 5.742  |
| Zfp831                      | Yes | Yes | 7(1) C           | 0.488 | 0.288  |
| 1110032F04Rik               |     |     |                  | 1.923 | 0.361  |
| 1110034A24Rik               |     |     |                  | 0.969 | 0.446  |
| 1500012F01Rik               |     |     |                  | 1.412 | 0.676  |
| 2810407C02Rik               | Yes | Yes | 7(2) 7(2) 7(1) C | 0.817 | 2.093  |
| 4930583H14Rik               |     |     |                  | 1.525 | 0.119  |
| 5830405N20Rik               | Yes | Yes |                  | 1.296 | 0.265  |
| 6430571L13Rik               |     |     | 8(1) 7(2)        | 1.348 | 5.213  |
| 8430427H17Rik               | Yes | No  |                  | 0.204 | 2.373  |



| A4galt        | Yes | No  |      | 1.520 | 2.939 |
|---------------|-----|-----|------|-------|-------|
| A530032D15Rik |     |     |      | 1.845 | 1.967 |
| A630033H20Rik |     |     | 8(2) | 1.906 | 2.129 |
| A630091E08Rik | Yes | Yes |      | 0.447 | 0.023 |
| AA467197      |     |     | 6(2) | 1.689 | 5.050 |

<sup>a</sup>Presence of PU.1 ChIP peak.

<sup>b</sup>Overlap between peaks in PU.1 and the 155 sample.

<sup>c</sup>Target seed of miR-155 present. C means that the seed site is conserved.

<sup>d</sup>Expression ratio between PU.1 and the WT sample (average of expression value calculated).

<sup>e</sup>Expression ratio between 155 and WT sample (average of expression value calculated).

<sup>f</sup>Genes with Known links to humoral immune response.

Table S2. Primers and FACS antibodies

| Gene           | Forward                   | Reverse                   |
|----------------|---------------------------|---------------------------|
| AID            | AAGACTTTGAGGGAGTCAAGAAAGT | AGATGTAGCGTAGGAACAACAATTC |
| $\beta$ -Actin | CACTTATCACCAGCCTCATTAGCTT | CAATTGCCTTTCTGACTAGGTGTTT |
| Blimp1         | ACACAGGAGAGAAGCCACATGA    | GGTGGGTCTTGAGATTGCTTGT    |
| Card11         | GCTCTTGTGTATAGAGTGCCAA    | CCACGTTATCCCATAGGGCCT     |
| Ccr7           | AAAACGTGCTGGTGGTG         | TGACCTCATCTTGGCAGAAG      |
| Cd300lf        | GCATGTTTCCAACGCTGACTAGCT  | CTCACCATCTCCAAGCAAAGAGC   |
| Cxcr4          | TCAACCTCTACAGCAGCGTTCTCTT | TGTTGGTGGCGTGACAAT        |
| Dap12          | CGTACAGGCCAGAGTGAC        | CACCAAGTCACCCAGAACAA      |
| Fcrl5          | GAGCATGCACGTGAACGTAGAGT   | TTCTATGCCTTTCTTTGCGTAGC   |
| HPRT           | TGGACAGGACTGAAAGACTTG     | CCAGCAGGTCAGCAAAGAACTTA   |
| PU.1           | TACCAACGTCCAATGCATGACTAC  | GAGTATCGAGGACGTGCATCTGTT  |
| Pax5           | TTTAGAGAAAAATTACCCGACTCCT | CTGTCTCATAATACCTGCCAAGAA  |
| Pax5 (ChIP)    | TGTAAGGGGATCCTGGTTGA      | AACTGGGAGGAACTGAAACCTAACC |
| Sema4b         | AACAGCAACCTCAGCTTCTTGC    | GGCCTCATCTTGGGCTAAAGTA    |
| Sirpa          | TCGTGGGATTGCTAACCTGTCT    | ATCCTCGGGGTAGAACCTCTCA    |
| Slamf1         | TAATCTTCATCCTGGTTTTACGGC  | TTGGGCATAAATAGTAAGGC      |

| Epitope | Clone    | Conjugate                                       |
|---------|----------|-------------------------------------------------|
| B220    | RA3-6B2; | FITC; PerCP-Cy5.5; PE; PE-Cy7; APC; APCe780; PB |
| CD3     | 145-2C11 | FITC                                            |
| CD4     | GK1.5    | PE-Cy7                                          |
| CD5     | 53-7.3   | APC                                             |
| CD8     | 53-6.7   | APC; PerCP-Cy5.5                                |
| CD19    | 6D5      | Pacific Blue; BV421                             |
| CD21    | 7G6      | FITC                                            |
| CD23    | B3B4     | PB; Biotin                                      |
| CD25    | PC61     | APC-Cy7                                         |
| CD43    | S7       | FITC                                            |
| CD93    | AA4.1    | APC                                             |
| CD138   | 281-2    | Biotin; PE                                      |
| cKit    | ACK45    | PE                                              |
| IgG1    | X56      | APC                                             |
| IgM     | R6-60.2  | PerCP-Cy5.5; APCe780                            |
| Mac-1   | M1/70    | PerCP-Cy5.5; PE; Biotin                         |
| Gr-1    | RB6.8CS  | APC                                             |
| Pax5    | 1H9      | PE                                              |
